# Supplementary material for: Sub-Doppler millimetre-wave spectroscopy of DBS and HBS: accurate values of nuclear electric and magnetic hyperfine structure constants
Source: Royal Society of Chemistry journal article supplement (doi:10.1039/b710356e), 2007-10-19
Supplement: b710356e.pdf [file b710356e.pdf]

Table S1

Observed saturation dip frequencies (MHz) and least-squares residuals for H(11)BS in its ground vibrational state.

| J' F1' F' <-- J F1 F | observed | o-c         | blends o-c | blends wt    |
|----------------------|----------|-------------|------------|--------------|
| 1: 2 2 2             | 1 1 1    | 76330.3890  | -0.0029    |              |
| 2: 2 2 1             | 1 1 0    | 76330.4630  | 0.0084     | 0.0035 0.30  |
| 3: 2 3 3             | 1 3 3    | 76330.4630  | 0.0014     | 0.0035 0.70  |
| 4: 2 3 2             | 1 3 2    | 76330.5090  | 0.0026     |              |
| 5: 2 4 3             | 1 3 2    | 76331.4330  | 0.0015     | -0.0024 0.33 |
| 6: 2 3 3             | 1 2 2    | 76331.4330  | -0.0022    | -0.0024 0.24 |
| 7: 2 4 4             | 1 3 3    | 76331.4330  | -0.0055    | -0.0024 0.44 |
| 8: 2 2 1             | 1 2 1    | 76332.0680  | 0.0036     | -0.0003 0.36 |
| 9: 2 2 2             | 1 2 2    | 76332.0680  | -0.0024    | -0.0003 0.64 |
| 10: 2 1 1            | 1 2 2    | 76332.9870  | 0.0000     |              |
| 11: 3 4 4            | 2 4 4    | 114494.7790 | 0.0008     |              |
| 12: 3 4 3            | 2 4 3    | 114494.8150 | -0.0039    |              |
| 13: 3 2 1            | 2 1 0    | 114495.5100 | 0.0130     | 0.0030 0.10  |
| 14: 3 2 2            | 2 1 1    | 114495.5100 | 0.0110     | 0.0030 0.26  |
| 15: 3 3 2            | 2 2 1    | 114495.5100 | 0.0013     | 0.0030 0.25  |
| 16: 3 3 3            | 2 2 2    | 114495.5100 | -0.0039    | 0.0030 0.39  |
| 17: 3 4 3            | 2 3 2    | 114495.7560 | 0.0120     | 0.0003 0.17  |
| 18: 3 4 4            | 2 3 3    | 114495.7560 | 0.0008     | 0.0003 0.23  |
| 19: 3 5 4            | 2 4 3    | 114495.7560 | -0.0013    | 0.0003 0.26  |
| 20: 3 5 5            | 2 4 4    | 114495.7560 | -0.0049    | 0.0003 0.33  |
| 21: 3 3 3            | 2 3 3    | 114496.1540 | 0.0048     | -0.0007 0.58 |
| 22: 3 3 2            | 2 3 2    | 114496.1540 | -0.0083    | -0.0007 0.42 |
| 23: 3 2 2            | 2 2 2    | 114496.4190 | 0.0034     | 0.0003 0.65  |
| 24: 3 2 1            | 2 2 1    | 114496.4190 | -0.0056    | 0.0003 0.35  |
| 25: 4 5 5            | 3 5 5    | 152657.5390 | 0.0002     |              |
| 26: 4 5 4            | 3 5 4    | 152657.5760 | -0.0008    |              |
| 27: 4 3 2            | 3 2 1    | 152658.3990 | 0.0072     | 0.0003 0.16  |
| 28: 4 3 3            | 3 2 2    | 152658.3990 | 0.0050     | 0.0003 0.26  |
| 29: 4 4 3            | 3 3 2    | 152658.3990 | -0.0009    | 0.0003 0.25  |
| 30: 4 4 4            | 3 3 3    | 152658.3990 | -0.0059    | 0.0003 0.33  |
| 31: 4 5 4            | 3 4 3    | 152658.5240 | 0.0087     | 0.0003 0.19  |
| 32: 4 5 5            | 3 4 4    | 152658.5240 | 0.0023     | 0.0003 0.24  |
| 33: 4 6 5            | 3 5 4    | 152658.5240 | -0.0022    | 0.0003 0.26  |
| 34: 4 6 6            | 3 5 5    | 152658.5240 | -0.0044    | 0.0003 0.31  |
| 35: 4 4 4            | 3 4 4    | 152658.7970 | -0.0019    |              |
| 36: 4 3 3            | 3 3 3    | 152659.3020 | 0.0063     | 0.0014 0.59  |
| 37: 4 3 2            | 3 3 2    | 152659.3020 | -0.0056    | 0.0014 0.41  |
| 38: 5 4 3            | 4 3 2    | 190819.1190 | 0.0062     | 0.0003 0.19  |
| 39: 5 4 4            | 4 3 3    | 190819.1190 | 0.0046     | 0.0003 0.25  |
| 40: 5 5 4            | 4 4 3    | 190819.1190 | -0.0015    | 0.0003 0.25  |
| 41: 5 5 5            | 4 4 4    | 190819.1190 | -0.0052    | 0.0003 0.31  |
| 42: 5 6 5            | 4 5 4    | 190819.1990 | 0.0069     | -0.0001 0.20 |

|           |       |             |         |         |      |
|-----------|-------|-------------|---------|---------|------|
| 43: 5 6 6 | 4 5 5 | 190819.1990 | 0.0026  | -0.0001 | 0.24 |
| 44: 5 7 6 | 4 6 5 | 190819.1990 | -0.0031 | -0.0001 | 0.26 |
| 45: 5 7 7 | 4 6 6 | 190819.1990 | -0.0045 | -0.0001 | 0.30 |

Table S2

Observed saturation dip frequencies (MHz) and least-squares residuals for H(11)BS in its  $v_2 = 1$  vibrationally excited.

| J' l' F1' F' <-- J l F1 F | observed | o-c         | blends o-c | blends wt |      |
|---------------------------|----------|-------------|------------|-----------|------|
| 1: 2 -1 4 3               | 1 1 3 2  | 76332.7330  | 0.0161     | 0.0030    | 0.43 |
| 2: 2 -1 4 4               | 1 1 3 3  | 76332.7330  | -0.0068    | 0.0030    | 0.57 |
| 3: 2 -1 1 1               | 1 1 1 0  | 76333.3800  | 0.0115     | -0.0026   | 0.24 |
| 4: 2 -1 1 1               | 1 1 1 1  | 76333.3800  | 0.0021     | -0.0026   | 0.50 |
| 5: 2 -1 1 0               | 1 1 1 1  | 76333.3800  | -0.0252    | -0.0026   | 0.25 |
| 6: 2 1 3 3                | 1 -1 2 2 | 76517.6960  | 0.0009     |           |      |
| 7: 2 1 3 2                | 1 -1 2 1 | 76517.7330  | 0.0004     |           |      |
| 8: 2 1 2 2                | 1 -1 2 2 | 76517.9880  | -0.0007    |           |      |
| 9: 2 1 2 1                | 1 -1 2 1 | 76518.0350  | -0.0005    |           |      |
| 10: 2 1 3 3               | 1 -1 3 3 | 76518.1690  | 0.0011     | -0.0001   | 0.60 |
| 11: 2 1 3 2               | 1 -1 3 2 | 76518.1690  | -0.0018    | -0.0001   | 0.40 |
| 12: 2 1 4 3               | 1 -1 3 3 | 76518.6310  | 0.0046     | -0.0030   | 0.43 |
| 13: 2 1 4 4               | 1 -1 3 3 | 76518.6310  | -0.0086    | -0.0030   | 0.57 |
| 14: 2 1 2 2               | 1 -1 1 1 | 76518.8480  | -0.0026    |           |      |
| 15: 2 1 1 1               | 1 -1 1 0 | 76519.2840  | 0.0129     | -0.0010   | 0.24 |
| 16: 2 1 1 1               | 1 -1 1 1 | 76519.2840  | 0.0036     | -0.0010   | 0.51 |
| 17: 2 1 1 0               | 1 -1 1 1 | 76519.2840  | -0.0237    | -0.0010   | 0.25 |
| 18: 3 1 4 4               | 2 -1 4 4 | 114496.8040 | 0.0106     | 0.0005    | 0.57 |
| 19: 3 1 4 3               | 2 -1 4 3 | 114496.8040 | -0.0132    | 0.0005    | 0.43 |
| 20: 3 1 3 3               | 2 -1 2 2 | 114497.2890 | 0.0161     | 0.0014    | 0.24 |
| 21: 3 1 3 2               | 2 -1 2 1 | 114497.2890 | 0.0092     | 0.0014    | 0.15 |
| 22: 3 1 4 3               | 2 -1 3 2 | 114497.2890 | -0.0050    | 0.0014    | 0.26 |
| 23: 3 1 4 4               | 2 -1 3 3 | 114497.2890 | -0.0071    | 0.0014    | 0.35 |
| 24: 3 1 5 4               | 2 -1 4 3 | 114497.5290 | 0.0023     | -0.0029   | 0.44 |
| 25: 3 1 5 5               | 2 -1 4 4 | 114497.5290 | -0.0070    | -0.0029   | 0.56 |
| 26: 3 1 2 2               | 2 -1 2 2 | 114497.9550 | 0.0071     | 0.0010    | 0.65 |
| 27: 3 1 2 1               | 2 -1 2 1 | 114497.9550 | -0.0105    | 0.0010    | 0.35 |
| 28: 3 -1 4 4              | 2 1 4 4  | 114775.6750 | 0.0108     | 0.0008    | 0.57 |
| 29: 3 -1 4 3              | 2 1 4 3  | 114775.6750 | -0.0129    | 0.0008    | 0.42 |
| 30: 3 -1 3 3              | 2 1 2 2  | 114776.1330 | 0.0127     | 0.0027    | 0.24 |
| 31: 3 -1 3 2              | 2 1 2 1  | 114776.1330 | 0.0057     | 0.0027    | 0.15 |
| 32: 3 -1 4 3              | 2 1 3 2  | 114776.1330 | -0.0008    | 0.0027    | 0.26 |
| 33: 3 -1 4 4              | 2 1 3 3  | 114776.1330 | -0.0028    | 0.0027    | 0.35 |
| 34: 3 -1 5 4              | 2 1 4 3  | 114776.3690 | 0.0025     | -0.0027   | 0.44 |
| 35: 3 -1 5 5              | 2 1 4 4  | 114776.3690 | -0.0068    | -0.0027   | 0.56 |
| 36: 3 -1 2 2              | 2 1 2 2  | 114776.7680 | 0.0037     | -0.0024   | 0.65 |

|     |          |          |             |         |         |      |
|-----|----------|----------|-------------|---------|---------|------|
| 37: | 3 -1 2 1 | 2 1 2 1  | 114776.7680 | -0.0139 | -0.0024 | 0.35 |
| 38: | 4 -1 5 5 | 3 1 5 5  | 152660.0010 | 0.0124  | -0.0004 | 0.56 |
| 39: | 4 -1 5 4 | 3 1 5 4  | 152660.0010 | -0.0167 | -0.0004 | 0.44 |
| 40: | 4 -1 4 3 | 3 1 3 2  | 152660.6680 | -0.0038 | -0.0040 | 0.42 |
| 41: | 4 -1 4 4 | 3 1 3 3  | 152660.6680 | -0.0042 | -0.0040 | 0.58 |
| 42: | 4 -1 5 4 | 3 1 4 3  | 152660.7300 | 0.0027  | 0.0005  | 0.44 |
| 43: | 4 -1 5 5 | 3 1 4 4  | 152660.7300 | -0.0012 | 0.0005  | 0.56 |
| 44: | 4 -1 6 5 | 3 1 5 4  | 152660.8320 | 0.0055  | 0.0029  | 0.45 |
| 45: | 4 -1 6 6 | 3 1 5 5  | 152660.8320 | 0.0006  | 0.0029  | 0.55 |
| 46: | 4 -1 3 3 | 3 1 3 3  | 152661.4360 | 0.0088  | 0.0031  | 0.59 |
| 47: | 4 -1 3 2 | 3 1 3 2  | 152661.4360 | -0.0052 | 0.0031  | 0.41 |
| 48: | 4 1 5 5  | 3 -1 5 5 | 153031.7960 | 0.0124  | -0.0003 | 0.56 |
| 49: | 4 1 5 4  | 3 -1 5 4 | 153031.7960 | -0.0167 | -0.0003 | 0.44 |
| 50: | 4 1 4 3  | 3 -1 3 2 | 153032.4380 | -0.0013 | -0.0016 | 0.42 |
| 51: | 4 1 4 4  | 3 -1 3 3 | 153032.4380 | -0.0017 | -0.0016 | 0.58 |
| 52: | 4 1 5 4  | 3 -1 4 3 | 153032.4950 | 0.0038  | 0.0016  | 0.44 |
| 53: | 4 1 5 5  | 3 -1 4 4 | 153032.4950 | -0.0002 | 0.0016  | 0.56 |
| 54: | 4 1 6 5  | 3 -1 5 4 | 153032.5930 | 0.0026  | -0.0001 | 0.45 |
| 55: | 4 1 6 6  | 3 -1 5 5 | 153032.5930 | -0.0022 | -0.0001 | 0.55 |
| 56: | 4 1 4 4  | 3 -1 4 4 | 153032.7300 | 0.0121  | 0.0040  | 0.55 |
| 57: | 4 1 4 3  | 3 -1 4 3 | 153032.7300 | -0.0057 | 0.0040  | 0.45 |
| 58: | 4 1 3 3  | 3 -1 3 3 | 153033.1730 | 0.0093  | 0.0036  | 0.59 |
| 59: | 4 1 3 2  | 3 -1 3 2 | 153033.1730 | -0.0047 | 0.0036  | 0.41 |
| 60: | 5 1 5 4  | 4 -1 4 3 | 190821.9280 | -0.0048 | -0.0058 | 0.44 |
| 61: | 5 1 5 5  | 4 -1 4 4 | 190821.9280 | -0.0064 | -0.0058 | 0.56 |
| 62: | 5 1 4 4  | 4 -1 3 3 | 190821.9770 | 0.0069  | -0.0011 | 0.22 |
| 63: | 5 1 4 3  | 4 -1 3 2 | 190821.9770 | 0.0059  | -0.0011 | 0.17 |
| 64: | 5 1 6 5  | 4 -1 5 4 | 190821.9770 | -0.0041 | -0.0011 | 0.28 |
| 65: | 5 1 6 6  | 4 -1 5 5 | 190821.9770 | -0.0075 | -0.0011 | 0.33 |
| 66: | 5 1 7 6  | 4 -1 6 5 | 190822.0420 | 0.0066  | 0.0051  | 0.46 |
| 67: | 5 1 7 7  | 4 -1 6 6 | 190822.0420 | 0.0037  | 0.0051  | 0.54 |
| 68: | 5 -1 5 4 | 4 1 4 3  | 191286.5980 | -0.0048 | -0.0057 | 0.44 |
| 69: | 5 -1 5 5 | 4 1 4 4  | 191286.5980 | -0.0064 | -0.0057 | 0.56 |
| 70: | 5 -1 4 4 | 4 1 3 3  | 191286.6450 | 0.0050  | -0.0018 | 0.22 |
| 71: | 5 -1 4 3 | 4 1 3 2  | 191286.6450 | 0.0039  | -0.0018 | 0.17 |
| 72: | 5 -1 6 5 | 4 1 5 4  | 191286.6450 | -0.0039 | -0.0018 | 0.28 |
| 73: | 5 -1 6 6 | 4 1 5 5  | 191286.6450 | -0.0073 | -0.0018 | 0.33 |
| 74: | 5 -1 7 6 | 4 1 6 5  | 191286.7100 | 0.0068  | 0.0053  | 0.46 |
| 75: | 5 -1 7 7 | 4 1 6 6  | 191286.7100 | 0.0039  | 0.0053  | 0.54 |

Table S3

Observed saturation dip frequencies (MHz) and least-squares residuals for H(10)BS in its ground vibrational state.

J' F1' F' <-- J F1 F      observed    o-c    blends o-c    blends wt

|     |       |       |                 |         |         |      |
|-----|-------|-------|-----------------|---------|---------|------|
| 1:  | 2 3 4 | 1 2 3 | 80318.6660      | -0.0015 |         |      |
| 2:  | 2 3 3 | 1 2 2 | 80318.6970      | -0.0025 |         |      |
| 3:  | 2 4 5 | 1 4 5 | 80318.9820      | -0.0001 |         |      |
| 4:  | 2 4 4 | 1 4 4 | 80319.0050      | 0.0000  |         |      |
| 5:  | 2 3 4 | 1 4 5 | 80319.1870      | -0.0006 |         |      |
| 6:  | 2 3 3 | 1 4 4 | 80319.2180      | -0.0015 |         |      |
| 7:  | 2 2 3 | 1 2 3 | 80319.6110      | 0.0097  | 0.0001  | 0.60 |
| 8:  | 2 2 2 | 1 2 2 | 80319.6110      | -0.0146 | 0.0001  | 0.40 |
| 9:  | 2 5 5 | 1 4 4 | 80320.3880      | 0.0022  | -0.0004 | 0.45 |
| 10: | 2 5 6 | 1 4 5 | 80320.3880      | -0.0025 | -0.0004 | 0.55 |
| 11: | 2 4 4 | 1 3 3 | 80320.5510      | 0.0087  | 0.0003  | 0.43 |
| 12: | 2 4 5 | 1 3 4 | 80320.5510      | -0.0062 | 0.0003  | 0.57 |
| 13: | 2 1 1 | 1 2 2 | 80320.6030      | 0.0065  | 0.0043  | 0.35 |
| 14: | 2 1 2 | 1 2 3 | 80320.6030      | 0.0030  | 0.0043  | 0.65 |
| 15: | 2 4 5 | 1 3 4 | (a) 80320.6580  | 0.1007  | -0.0020 | 0.50 |
| 16: | 2 3 4 | 1 3 4 | (a) 80320.6580  | -0.1047 | -0.0020 | 0.50 |
| 17: | 2 1 2 | 1 2 3 | (a) 80320.6840  | 0.0840  | 0.0026  | 0.50 |
| 18: | 2 3 4 | 1 3 4 | (a) 80320.6840  | -0.0787 | 0.0026  | 0.50 |
| 19: | 2 3 3 | 1 3 3 | 80320.7600      | 0.0032  | -0.0002 | 0.43 |
| 20: | 2 3 4 | 1 3 4 | 80320.7600      | -0.0027 | -0.0002 | 0.57 |
| 21: | 2 2 2 | 1 3 3 | 80321.6910      | 0.0081  | 0.0001  | 0.41 |
| 22: | 2 2 3 | 1 3 4 | 80321.6910      | -0.0054 | 0.0001  | 0.59 |
| 23: | 3 5 6 | 2 5 6 | 120477.6650     | 0.0019  |         |      |
| 24: | 3 5 5 | 2 5 5 | 120477.6860     | 0.0025  |         |      |
| 25: | 3 2 3 | 2 1 2 | 120478.0260     | 0.0000  |         |      |
| 26: | 3 2 2 | 2 1 1 | 120478.0630     | 0.0023  |         |      |
| 27: | 3 3 4 | 2 2 3 | 120478.2870     | 0.0021  | -0.0013 | 0.59 |
| 28: | 3 3 3 | 2 2 2 | 120478.2870     | -0.0062 | -0.0013 | 0.41 |
| 29: | 3 4 4 | 2 3 3 | 120478.7150     | 0.0022  | 0.0002  | 0.44 |
| 30: | 3 4 5 | 2 3 4 | 120478.7150     | -0.0013 | 0.0002  | 0.56 |
| 31: | 3 4 5 | 2 3 4 | (a) 120478.8210 | 0.1046  | 0.0019  | 0.50 |
| 32: | 3 4 5 | 2 4 5 | (a) 120478.8210 | -0.1008 | 0.0019  | 0.50 |
| 33: | 3 6 6 | 2 5 5 | 120478.9790     | 0.0013  | -0.0001 | 0.46 |
| 34: | 3 6 7 | 2 5 6 | 120478.9790     | -0.0012 | -0.0001 | 0.54 |
| 35: | 3 5 5 | 2 4 4 | 120479.0700     | 0.0059  | 0.0019  | 0.45 |
| 36: | 3 5 6 | 2 4 5 | 120479.0700     | -0.0014 | 0.0019  | 0.55 |
| 37: | 3 3 4 | 2 3 4 | 120479.2190     | 0.0004  | 0.0001  | 0.58 |
| 38: | 3 3 3 | 2 3 3 | 120479.2190     | -0.0003 | 0.0001  | 0.42 |
| 39: | 3 3 4 | 2 3 4 | (a) 120479.3210 | 0.1024  | -0.0003 | 0.50 |
| 40: | 3 3 4 | 2 4 5 | (a) 120479.3210 | -0.1030 | -0.0003 | 0.50 |
| 41: | 3 1 2 | 2 2 3 | 120479.6910     | -0.0015 | -0.0016 | 0.65 |
| 42: | 3 1 1 | 2 2 2 | 120479.6910     | -0.0016 | -0.0016 | 0.35 |
| 43: | 3 2 2 | 2 3 3 | 120479.9570     | -0.0005 | -0.0011 | 0.41 |
| 44: | 3 2 3 | 2 3 4 | 120479.9570     | -0.0014 | -0.0011 | 0.59 |
| 45: | 4 3 4 | 3 2 3 | 160635.4690     | 0.0018  | 0.0013  | 0.61 |
| 46: | 4 2 3 | 3 1 2 | 160635.4690     | 0.0004  | 0.0013  | 0.39 |
| 47: | 4 4 4 | 3 3 3 | 160635.5950     | -0.0010 | -0.0019 | 0.44 |
| 48: | 4 4 5 | 3 3 4 | 160635.5950     | -0.0024 | -0.0019 | 0.56 |
| 49: | 4 5 6 | 3 5 6 | 160635.6450     | 0.0034  | -0.0002 | 0.56 |
| 50: | 4 5 5 | 3 5 5 | 160635.6450     | -0.0048 | -0.0002 | 0.44 |

|     |       |       |                 |         |         |      |
|-----|-------|-------|-----------------|---------|---------|------|
| 51: | 4 5 6 | 3 5 6 | (a) 160635.7150 | 0.0734  | 0.0009  | 0.50 |
| 52: | 4 5 5 | 3 4 4 | (a) 160635.7150 | -0.0717 | 0.0009  | 0.50 |
| 53: | 4 5 5 | 3 4 4 | 160635.7880     | 0.0013  | -0.0011 | 0.45 |
| 54: | 4 5 6 | 3 4 5 | 160635.7880     | -0.0030 | -0.0011 | 0.55 |
| 55: | 4 7 7 | 3 6 6 | 160635.8770     | -0.0011 | -0.0020 | 0.46 |
| 56: | 4 7 8 | 3 6 7 | 160635.8770     | -0.0026 | -0.0020 | 0.54 |
| 57: | 4 6 6 | 3 5 5 | 160635.9340     | 0.0020  | -0.0004 | 0.46 |
| 58: | 4 6 7 | 3 5 6 | 160635.9340     | -0.0025 | -0.0004 | 0.54 |
| 59: | 4 4 5 | 3 4 5 | 160636.0990     | -0.0006 | -0.0020 | 0.55 |
| 60: | 4 4 4 | 3 4 4 | 160636.0990     | -0.0036 | -0.0020 | 0.45 |
| 61: | 4 3 4 | 3 3 4 | 160636.2070     | 0.0000  | -0.0010 | 0.58 |
| 62: | 4 3 3 | 3 3 3 | 160636.2070     | -0.0022 | -0.0010 | 0.42 |
| 63: | 5 3 4 | 4 2 3 | 200790.2510     | 0.0056  | 0.0009  | 0.25 |
| 64: | 5 3 3 | 4 2 2 | 200790.2510     | 0.0038  | 0.0009  | 0.18 |
| 65: | 5 4 4 | 4 3 3 | 200790.2510     | -0.0019 | 0.0009  | 0.25 |
| 66: | 5 4 5 | 4 3 4 | 200790.2510     | -0.0023 | 0.0009  | 0.32 |
| 67: | 5 5 5 | 4 4 4 | 200790.3350     | 0.0026  | 0.0014  | 0.36 |
| 68: | 5 2 3 | 4 1 2 | 200790.3350     | 0.0015  | 0.0014  | 0.21 |
| 69: | 5 5 6 | 4 4 5 | 200790.3350     | 0.0002  | 0.0014  | 0.44 |
| 70: | 5 6 6 | 4 5 5 | 200790.4450     | 0.0018  | 0.0000  | 0.46 |
| 71: | 5 6 7 | 4 5 6 | 200790.4450     | -0.0015 | 0.0000  | 0.54 |
| 72: | 5 8 8 | 4 7 7 | 200790.4870     | 0.0011  | 0.0006  | 0.47 |
| 73: | 5 8 9 | 4 7 8 | 200790.4870     | 0.0001  | 0.0006  | 0.53 |
| 74: | 5 7 7 | 4 6 6 | 200790.5250     | 0.0027  | 0.0011  | 0.46 |
| 75: | 5 7 8 | 4 6 7 | 200790.5250     | -0.0002 | 0.0011  | 0.54 |
| 76: | 5 5 6 | 4 5 6 | 200790.6440     | 0.0006  | -0.0017 | 0.54 |
| 77: | 5 5 5 | 4 5 5 | 200790.6440     | -0.0043 | -0.0017 | 0.46 |
| 78: | 5 4 5 | 4 4 5 | 200790.8640     | 0.0011  | -0.0003 | 0.56 |
| 79: | 5 4 4 | 4 4 4 | 200790.8640     | -0.0020 | -0.0003 | 0.44 |

-----  
 (a) cross-over transition.

Table S4

Observed saturation dip frequencies (MHz) and least-squares residuals for H(10)BS in its  $v_2 = 1$  vibrationally excited.

|    | J' l' F1' F' <-- | J l F1 F | observed   | o-c     | blends o-c | blends wt |
|----|------------------|----------|------------|---------|------------|-----------|
| 1: | 2 -1 4 5         | 1 1 3 4  | 80330.8210 | 0.0016  | -0.0064    | 0.57      |
| 2: | 2 -1 4 4         | 1 1 3 3  | 80330.8210 | -0.0168 | -0.0064    | 0.43      |
| 3: | 2 -1 3 4         | 1 1 3 4  | 80330.9280 | 0.0089  | -0.0009    | 0.57      |
| 4: | 2 -1 3 3         | 1 1 3 3  | 80330.9280 | -0.0140 | -0.0009    | 0.43      |
| 5: | 2 -1 2 3         | 1 1 3 4  | 80331.3990 | 0.0067  | -0.0011    | 0.59      |
| 6: | 2 -1 2 2         | 1 1 3 3  | 80331.3990 | -0.0125 | -0.0011    | 0.41      |
| 7: | 2 -1 4 4         | 1 1 4 4  | 80331.5480 | -0.0043 | -0.0046    | 0.44      |
| 8: | 2 -1 4 5         | 1 1 4 5  | 80331.5480 | -0.0048 | -0.0046    | 0.56      |
| 9: | 2 -1 3 4         | 1 1 2 3  | 80331.9230 | 0.0025  | 0.0009     | 0.59      |

|     |          |              |             |         |         |      |
|-----|----------|--------------|-------------|---------|---------|------|
| 10: | 2 -1 3 3 | 1 1 2 2      | 80331.9230  | -0.0014 | 0.0009  | 0.41 |
| 11: | 2 -1 5 5 | 1 1 4 4      | 80332.2700  | 0.0050  | -0.0028 | 0.45 |
| 12: | 2 -1 5 6 | 1 1 4 5      | 80332.2700  | -0.0092 | -0.0028 | 0.55 |
| 13: | 2 -1 2 3 | 1 1 2 3      | 80332.3970  | 0.0033  | 0.0032  | 0.61 |
| 14: | 2 -1 2 2 | 1 1 2 2      | 80332.3970  | 0.0031  | 0.0032  | 0.39 |
| 15: | 2 -1 1 1 | 1 1 2 2      | 80332.8980  | 0.0103  | 0.0015  | 0.36 |
| 16: | 2 -1 1 2 | 1 1 2 3      | 80332.8980  | -0.0033 | 0.0015  | 0.64 |
| 17: | 2 1 4 5  | 1 -1 3 4     | 80534.2300  | 0.0083  | 0.0003  | 0.57 |
| 18: | 2 1 4 4  | 1 -1 3 3     | 80534.2300  | -0.0101 | 0.0003  | 0.43 |
| 19: | 2 1 3 4  | 1 -1 3 4     | 80534.3270  | 0.0140  | 0.0042  | 0.57 |
| 20: | 2 1 3 3  | 1 -1 3 3     | 80534.3270  | -0.0089 | 0.0042  | 0.43 |
| 21: | 2 1 2 3  | 1 -1 3 4     | 80534.7590  | 0.0083  | 0.0005  | 0.59 |
| 22: | 2 1 2 2  | 1 -1 3 3     | 80534.7590  | -0.0108 | 0.0005  | 0.41 |
| 23: | 2 1 4 4  | 1 -1 4 4     | 80535.0130  | -0.0002 | -0.0005 | 0.44 |
| 24: | 2 1 4 5  | 1 -1 4 5     | 80535.0130  | -0.0007 | -0.0005 | 0.56 |
| 25: | 2 1 5 5  | 1 -1 4 4     | 80535.6860  | 0.0124  | 0.0046  | 0.45 |
| 26: | 2 1 5 6  | 1 -1 4 5     | 80535.6860  | -0.0018 | 0.0046  | 0.55 |
| 27: | 2 1 2 3  | 1 -1 2 3     | 80535.8330  | 0.0018  | 0.0018  | 0.61 |
| 28: | 2 1 2 2  | 1 -1 2 2     | 80535.8330  | 0.0016  | 0.0018  | 0.39 |
| 29: | 2 1 1 2  | 1 -1 2 2     | 80536.3010  | 0.0058  | 0.0004  | 0.09 |
| 30: | 2 1 1 2  | 1 -1 2 3     | 80536.3010  | -0.0001 | 0.0004  | 0.91 |
| 31: | 3 1 5 6  | 2 -1 5 6     | 120495.4640 | 0.0077  | 0.0027  | 0.55 |
| 32: | 3 1 5 5  | 2 -1 5 5     | 120495.4640 | -0.0033 | 0.0027  | 0.45 |
| 33: | 3 1 3 4  | 2 -1 2 3     | 120495.8690 | 0.0001  | -0.0037 | 0.59 |
| 34: | 3 1 3 3  | 2 -1 2 2     | 120495.8690 | -0.0092 | -0.0037 | 0.41 |
| 35: | 3 1 4 5  | 2 -1 3 4     | 120495.9670 | 0.0016  | 0.0006  | 0.56 |
| 36: | 3 1 4 4  | 2 -1 3 3     | 120495.9670 | -0.0006 | 0.0006  | 0.44 |
| 37: | 3 1 4 5  | 2 -1 4 5     | 120496.0680 | 0.0029  | -0.0001 | 0.56 |
| 38: | 3 1 4 4  | 2 -1 4 4     | 120496.0680 | -0.0038 | -0.0001 | 0.44 |
| 39: | 3 1 4 5  | 2 -1 3 4 (a) | 120496.0210 | 0.0556  | 0.0024  | 0.50 |
| 40: | 3 1 4 4  | 2 -1 4 4 (a) | 120496.0210 | -0.0508 | 0.0024  | 0.50 |
| 41: | 3 1 4 5  | 2 -1 4 5 (a) | 120496.1240 | 0.0589  | 0.0001  | 0.50 |
| 42: | 3 1 5 6  | 2 -1 4 5 (a) | 120496.1240 | -0.0587 | 0.0001  | 0.50 |
| 43: | 3 1 5 5  | 2 -1 4 4     | 120496.1830 | 0.0029  | 0.0015  | 0.45 |
| 44: | 3 1 5 6  | 2 -1 4 5     | 120496.1830 | 0.0002  | 0.0015  | 0.55 |
| 45: | 3 1 6 6  | 2 -1 5 5     | 120496.4530 | 0.0000  | -0.0033 | 0.46 |
| 46: | 3 1 6 7  | 2 -1 5 6     | 120496.4530 | -0.0060 | -0.0033 | 0.54 |
| 47: | 3 1 0 1  | 2 -1 1 2     | 120496.7150 | -0.0009 | -0.0033 | 0.70 |
| 48: | 3 1 0 1  | 2 -1 1 1     | 120496.7150 | -0.0087 | -0.0033 | 0.30 |
| 49: | 3 -1 5 6 | 2 1 5 6      | 120800.6190 | 0.0096  | 0.0047  | 0.55 |
| 50: | 3 -1 5 5 | 2 1 5 5      | 120800.6190 | -0.0014 | 0.0047  | 0.45 |
| 51: | 3 -1 3 4 | 2 1 2 3      | 120801.0010 | 0.0021  | -0.0018 | 0.59 |
| 52: | 3 -1 3 3 | 2 1 2 2      | 120801.0010 | -0.0072 | -0.0018 | 0.41 |
| 53: | 3 -1 4 4 | 2 1 3 3      | 120801.0820 | 0.0004  | 0.0001  | 0.97 |
| 54: | 3 -1 4 4 | 2 1 3 4      | 120801.0820 | -0.0095 | 0.0001  | 0.03 |
| 55: | 3 -1 4 5 | 2 1 3 4 (a)  | 120801.1310 | 0.0516  | 0.0026  | 0.50 |
| 56: | 3 -1 4 4 | 2 1 4 4 (a)  | 120801.1310 | -0.0464 | 0.0026  | 0.50 |
| 57: | 3 -1 4 5 | 2 1 4 5      | 120801.1720 | 0.0013  | -0.0016 | 0.56 |
| 58: | 3 -1 4 4 | 2 1 4 4      | 120801.1720 | -0.0054 | -0.0016 | 0.44 |
| 59: | 3 -1 4 5 | 2 1 4 5 (a)  | 120801.2270 | 0.0563  | 0.0000  | 0.50 |

|     |          |             |             |         |         |      |
|-----|----------|-------------|-------------|---------|---------|------|
| 60: | 3 -1 5 6 | 2 1 4 5 (a) | 120801.2270 | -0.0564 | 0.0000  | 0.50 |
| 61: | 3 -1 5 5 | 2 1 4 4     | 120801.2840 | 0.0032  | 0.0018  | 0.45 |
| 62: | 3 -1 5 6 | 2 1 4 5     | 120801.2840 | 0.0005  | 0.0018  | 0.55 |
| 63: | 3 -1 6 6 | 2 1 5 5     | 120801.5580 | 0.0008  | -0.0025 | 0.46 |
| 64: | 3 -1 6 7 | 2 1 5 6     | 120801.5580 | -0.0052 | -0.0025 | 0.54 |
| 65: | 3 -1 0 1 | 2 1 1 2     | 120801.8170 | 0.0017  | -0.0006 | 0.70 |
| 66: | 3 -1 0 1 | 2 1 1 1     | 120801.8170 | -0.0060 | -0.0006 | 0.30 |
| 67: | 3 -1 1 2 | 2 1 2 3     | 120802.0070 | 0.0004  | -0.0007 | 0.65 |
| 68: | 3 -1 1 1 | 2 1 2 2     | 120802.0070 | -0.0027 | -0.0007 | 0.35 |
| 69: | 4 -1 4 5 | 3 1 3 4     | 160658.7290 | 0.0000  | -0.0003 | 0.57 |
| 70: | 4 -1 4 4 | 3 1 3 3     | 160658.7290 | -0.0008 | -0.0003 | 0.43 |
| 71: | 4 -1 5 5 | 3 1 4 4     | 160658.8500 | 0.0069  | 0.0058  | 0.45 |
| 72: | 4 -1 5 6 | 3 1 4 5     | 160658.8500 | 0.0048  | 0.0058  | 0.55 |
| 73: | 4 -1 6 6 | 3 1 5 5     | 160658.9830 | 0.0023  | 0.0004  | 0.46 |
| 74: | 4 -1 6 7 | 3 1 5 6     | 160658.9830 | -0.0012 | 0.0004  | 0.54 |
| 75: | 4 -1 7 7 | 3 1 6 6     | 160659.0650 | 0.0033  | 0.0016  | 0.46 |
| 76: | 4 -1 7 8 | 3 1 6 7     | 160659.0650 | 0.0001  | 0.0016  | 0.54 |
| 77: | 4 1 6 6  | 3 -1 5 5    | 161065.7600 | 0.0008  | -0.0010 | 0.46 |
| 78: | 4 1 6 7  | 3 -1 5 6    | 161065.7600 | -0.0026 | -0.0010 | 0.54 |
| 79: | 4 1 7 7  | 3 -1 6 6    | 161065.8440 | 0.0016  | -0.0001 | 0.46 |
| 80: | 4 1 7 8  | 3 -1 6 7    | 161065.8440 | -0.0015 | -0.0001 | 0.54 |
| 81: | 4 1 2 3  | 3 -1 2 3    | 161066.0270 | -0.0035 | -0.0060 | 0.61 |
| 82: | 4 1 2 2  | 3 -1 2 2    | 161066.0270 | -0.0098 | -0.0060 | 0.39 |

-----  
 (a) cross-over transition.

Table S5

=====

Observed saturation dip frequencies (MHz) and least-squares residuals for D(11)BS  
 in its ground vibrational state.

|     | J' F1' F' <-- | J F1 F | observed   | o-c     | blends o-c | blends wt |
|-----|---------------|--------|------------|---------|------------|-----------|
| 1:  | 2 2 3         | 1 1 2  | 63750.3720 | 0.0073  | -0.0007    | 0.51      |
| 2:  | 2 2 1         | 1 1 1  | 63750.3720 | -0.0137 | -0.0007    | 0.15      |
| 3:  | 2 2 2         | 1 1 2  | 63750.3720 | -0.0036 | -0.0007    | 0.15      |
| 4:  | 2 2 2         | 1 1 1  | 63750.3720 | -0.0099 | -0.0007    | 0.19      |
| 5:  | 2 3 3         | 1 3 3  | 63750.4410 | 0.0060  | -0.0028    | 0.32      |
| 6:  | 2 3 4         | 1 3 4  | 63750.4410 | -0.0004 | -0.0028    | 0.47      |
| 7:  | 2 3 2         | 1 3 2  | 63750.4410 | -0.0213 | -0.0028    | 0.21      |
| 8:  | 2 2 3         | 1 3 4  | 63751.0960 | 0.0001  |            |           |
| 9:  | 2 1 2         | 1 1 2  | 63751.3020 | 0.0084  | 0.0018     | 0.39      |
| 10: | 2 1 2         | 1 1 1  | 63751.3020 | 0.0020  | 0.0018     | 0.30      |
| 11: | 2 1 1         | 1 1 2  | 63751.3020 | -0.0068 | 0.0018     | 0.31      |
| 12: | 2 3 4         | 1 2 3  | 63751.3880 | -0.0036 |            |           |
| 13: | 2 4 5         | 1 3 4  | 63751.4060 | 0.0034  | 0.0009     | 0.44      |
| 14: | 2 4 4         | 1 3 3  | 63751.4060 | -0.0043 | 0.0009     | 0.32      |
| 15: | 2 4 3         | 1 3 2  | 63751.4060 | 0.0032  | 0.0009     | 0.24      |

|     |       |       |             |         |         |      |
|-----|-------|-------|-------------|---------|---------|------|
| 16: | 2 2 3 | 1 2 3 | 63752.0500  | 0.0039  | 0.0023  | 0.85 |
| 17: | 2 2 2 | 1 2 3 | 63752.0500  | -0.0070 | 0.0023  | 0.15 |
| 18: | 2 2 1 | 1 2 2 | 63752.0770  | -0.0022 | 0.0031  | 0.24 |
| 19: | 2 2 3 | 1 2 2 | 63752.0770  | 0.0124  | 0.0031  | 0.23 |
| 20: | 2 2 2 | 1 2 2 | 63752.0770  | 0.0015  | 0.0031  | 0.53 |
| 21: | 2 1 2 | 1 2 3 | 63752.9790  | 0.0040  |         |      |
| 22: | 3 4 4 | 2 4 4 | 95625.2000  | 0.0050  | 0.0010  | 0.36 |
| 23: | 3 4 3 | 2 4 3 | 95625.2000  | -0.0106 | 0.0010  | 0.21 |
| 24: | 3 4 5 | 2 4 5 | 95625.2000  | 0.0035  | 0.0010  | 0.43 |
| 25: | 3 3 2 | 2 2 1 | 95625.9150  | 0.0100  | 0.0035  | 0.18 |
| 26: | 3 2 3 | 2 1 2 | 95625.9150  | 0.0077  | 0.0035  | 0.34 |
| 27: | 3 3 4 | 2 2 3 | 95625.9150  | -0.0018 | 0.0035  | 0.48 |
| 28: | 3 2 2 | 2 1 1 | 95625.9380  | 0.0059  | -0.0002 | 0.24 |
| 29: | 3 3 3 | 2 2 2 | 95625.9380  | 0.0001  | -0.0002 | 0.57 |
| 30: | 3 2 2 | 2 1 2 | 95625.9380  | -0.0093 | -0.0002 | 0.19 |
| 31: | 3 4 3 | 2 3 2 | 95626.1640  | 0.0128  | -0.0001 | 0.09 |
| 32: | 3 4 5 | 2 3 4 | 95626.1640  | 0.0065  | -0.0001 | 0.18 |
| 33: | 3 5 6 | 2 4 5 | 95626.1640  | -0.0016 | -0.0001 | 0.25 |
| 34: | 3 5 4 | 2 4 3 | 95626.1640  | -0.0011 | -0.0001 | 0.16 |
| 35: | 3 5 5 | 2 4 4 | 95626.1640  | -0.0051 | -0.0001 | 0.20 |
| 36: | 3 4 4 | 2 3 3 | 95626.1640  | -0.0063 | -0.0001 | 0.13 |
| 37: | 3 3 2 | 2 3 2 | 95626.5730  | 0.0000  | -0.0021 | 0.23 |
| 38: | 3 3 4 | 2 3 4 | 95626.5730  | 0.0017  | -0.0021 | 0.50 |
| 39: | 3 3 3 | 2 3 3 | 95626.5730  | -0.0110 | -0.0021 | 0.27 |
| 40: | 3 2 3 | 2 2 2 | 95626.8340  | 0.0087  | -0.0005 | 0.16 |
| 41: | 3 2 3 | 2 2 3 | 95626.8340  | -0.0022 | -0.0005 | 0.84 |
| 42: | 3 2 2 | 2 2 2 | 95626.8650  | -0.0003 | -0.0023 | 0.52 |
| 43: | 3 2 2 | 2 2 3 | 95626.8650  | -0.0113 | -0.0023 | 0.25 |
| 44: | 3 2 2 | 2 2 1 | 95626.8650  | 0.0033  | -0.0023 | 0.23 |
| 45: | 3 2 3 | 2 3 4 | 95627.4870  | -0.0035 |         |      |
| 46: | 4 5 4 | 3 5 4 | 127498.9470 | -0.0063 | 0.0016  | 0.39 |
| 47: | 4 5 6 | 3 5 6 | 127498.9470 | 0.0067  | 0.0016  | 0.61 |
| 48: | 4 4 5 | 3 3 4 | 127499.7950 | 0.0019  | -0.0019 | 0.57 |
| 49: | 4 4 4 | 3 3 3 | 127499.7950 | -0.0071 | -0.0019 | 0.43 |
| 50: | 4 6 5 | 3 5 4 | 127499.9190 | 0.0018  | 0.0010  | 0.45 |
| 51: | 4 6 6 | 3 5 5 | 127499.9190 | 0.0002  | 0.0010  | 0.55 |
| 52: | 4 4 5 | 3 4 5 | 127500.2090 | 0.0021  | -0.0012 | 0.62 |
| 53: | 4 4 4 | 3 4 4 | 127500.2090 | -0.0067 | -0.0012 | 0.38 |
| 54: | 4 3 4 | 3 3 4 | 127500.7090 | 0.0042  | -0.0018 | 0.63 |
| 55: | 4 3 3 | 3 3 3 | 127500.7090 | -0.0120 | -0.0018 | 0.37 |
| 56: | 5 6 6 | 4 6 6 | 159371.3200 | 0.0003  | 0.0017  | 0.46 |
| 57: | 5 6 7 | 4 6 7 | 159371.3200 | 0.0027  | 0.0017  | 0.54 |
| 58: | 5 4 5 | 4 3 4 | 159372.2220 | 0.0068  | 0.0006  | 0.32 |
| 59: | 5 5 6 | 4 4 5 | 159372.2220 | -0.0002 | 0.0006  | 0.38 |
| 60: | 5 5 5 | 4 4 4 | 159372.2220 | -0.0048 | 0.0006  | 0.30 |
| 61: | 5 6 6 | 4 5 5 | 159372.3000 | 0.0029  | 0.0003  | 0.29 |
| 62: | 5 7 8 | 4 6 7 | 159372.3000 | -0.0005 | 0.0003  | 0.41 |
| 63: | 5 7 6 | 4 6 5 | 159372.3000 | -0.0010 | 0.0003  | 0.30 |
| 64: | 5 4 3 | 4 4 3 | 159373.1320 | 0.0017  | 0.0009  | 0.26 |
| 65: | 5 4 5 | 4 4 5 | 159373.1320 | 0.0051  | 0.0009  | 0.44 |



|           |       |             |         |         |      |
|-----------|-------|-------------|---------|---------|------|
| 66: 5 4 4 | 4 4 4 | 159373.1320 | -0.0058 | 0.0009  | 0.30 |
| 67: 6 5 6 | 5 4 5 | 191242.9100 | 0.0037  | -0.0010 | 0.26 |
| 68: 6 5 5 | 5 4 4 | 191242.9100 | 0.0016  | -0.0010 | 0.20 |
| 69: 6 6 7 | 5 5 6 | 191242.9100 | -0.0030 | -0.0010 | 0.30 |
| 70: 6 6 6 | 5 5 5 | 191242.9100 | -0.0057 | -0.0010 | 0.25 |
| 71: 6 7 8 | 5 6 7 | 191242.9670 | 0.0042  | 0.0000  | 0.25 |
| 72: 6 7 7 | 5 6 6 | 191242.9670 | 0.0022  | 0.0000  | 0.21 |
| 73: 6 8 9 | 5 7 8 | 191242.9670 | -0.0024 | 0.0000  | 0.29 |
| 74: 6 8 8 | 5 7 7 | 191242.9670 | -0.0033 | 0.0000  | 0.25 |

Table S6

Observed saturation dip frequencies (MHz) and least-squares residuals for D(11)BS in its  $v_2 = 1$  vibrationally excited.

| J' I' F1' F' <-- J I F1 F | observed | o-c        | blends o-c | blends wt |      |
|---------------------------|----------|------------|------------|-----------|------|
| 1: 2 -1 3 3               | 1 1 2 2  | 63800.6450 | 0.0009     | -0.0024   | 0.34 |
| 2: 2 -1 3 4               | 1 1 2 3  | 63800.6450 | 0.0010     | -0.0024   | 0.50 |
| 3: 2 -1 3 2               | 1 1 2 1  | 63800.6450 | -0.0196    | -0.0024   | 0.16 |
| 4: 2 -1 2 3               | 1 1 2 3  | 63800.9720 | 0.0013     |           |      |
| 5: 2 -1 3 2               | 1 1 3 2  | 63801.0890 | 0.0142     | -0.0007   | 0.22 |
| 6: 2 -1 3 4               | 1 1 3 4  | 63801.0890 | 0.0047     | -0.0007   | 0.44 |
| 7: 2 -1 3 3               | 1 1 3 3  | 63801.0890 | -0.0181    | -0.0007   | 0.33 |
| 8: 2 -1 4 5               | 1 1 3 4  | 63801.5750 | -0.0055    | 0.0013    | 0.66 |
| 9: 2 -1 4 3               | 1 1 3 2  | 63801.5750 | 0.0142     | 0.0013    | 0.34 |
| 10: 2 -1 4 4              | 1 1 3 3  | 63801.6110 | 0.0002     |           |      |
| 11: 2 -1 2 2              | 1 1 1 2  | 63801.7900 | -0.0039    | 0.0002    | 0.14 |
| 12: 2 -1 2 3              | 1 1 1 2  | 63801.7900 | 0.0015     | 0.0002    | 0.60 |
| 13: 2 -1 2 2              | 1 1 1 1  | 63801.7900 | -0.0007    | 0.0002    | 0.25 |
| 14: 2 -1 1 2              | 1 1 1 1  | 63802.2580 | 0.0042     | -0.0002   | 0.30 |
| 15: 2 -1 1 2              | 1 1 1 2  | 63802.2580 | 0.0010     | -0.0002   | 0.41 |
| 16: 2 -1 1 1              | 1 1 1 2  | 63802.2580 | -0.0065    | -0.0002   | 0.29 |
| 17: 2 1 3 3               | 1 -1 2 2 | 63963.2790 | 0.0001     | 0.0001    | 0.38 |
| 18: 2 1 3 4               | 1 -1 2 3 | 63963.2790 | 0.0001     | 0.0001    | 0.62 |
| 19: 2 1 2 3               | 1 -1 2 3 | 63963.5890 | 0.0018     |           |      |
| 20: 2 1 3 3               | 1 -1 3 3 | 63963.7520 | -0.0156    | -0.0022   | 0.41 |
| 21: 2 1 3 4               | 1 -1 3 4 | 63963.7520 | 0.0071     | -0.0022   | 0.59 |
| 22: 2 1 4 3               | 1 -1 3 2 | 63964.2100 | 0.0143     | 0.0015    | 0.35 |
| 23: 2 1 4 5               | 1 -1 3 4 | 63964.2100 | -0.0053    | 0.0015    | 0.65 |
| 24: 2 1 4 4               | 1 -1 3 3 | 63964.2460 | 0.0003     |           |      |
| 25: 2 1 2 3               | 1 -1 1 2 | 63964.4530 | 0.0017     | 0.0005    | 0.77 |
| 26: 2 1 2 2               | 1 -1 1 2 | 63964.4530 | -0.0037    | 0.0005    | 0.23 |
| 27: 2 1 1 2               | 1 -1 1 1 | 63964.8940 | 0.0032     | -0.0013   | 0.30 |
| 28: 2 1 1 2               | 1 -1 1 2 | 63964.8940 | 0.0000     | -0.0013   | 0.39 |
| 29: 2 1 1 1               | 1 -1 1 2 | 63964.8940 | -0.0076    | -0.0013   | 0.30 |
| 30: 3 1 4 3               | 2 -1 4 3 | 95700.5270 | -0.0013    | 0.0006    | 0.23 |

|     |          |          |             |         |         |      |
|-----|----------|----------|-------------|---------|---------|------|
| 31: | 3 1 4 5  | 2 -1 4 5 | 95700.5270  | 0.0043  | 0.0006  | 0.43 |
| 32: | 3 1 4 4  | 2 -1 4 4 | 95700.5270  | -0.0029 | 0.0006  | 0.34 |
| 33: | 3 1 3 4  | 2 -1 2 3 | 95701.0150  | 0.0147  | 0.0018  | 0.26 |
| 34: | 3 1 4 3  | 2 -1 3 2 | 95701.0150  | 0.0007  | 0.0018  | 0.20 |
| 35: | 3 1 4 5  | 2 -1 3 4 | 95701.0150  | -0.0038 | 0.0018  | 0.38 |
| 36: | 3 1 3 3  | 2 -1 2 2 | 95701.0150  | -0.0040 | 0.0018  | 0.17 |
| 37: | 3 1 5 4  | 2 -1 4 3 | 95701.2580  | 0.0030  | -0.0002 | 0.39 |
| 38: | 3 1 5 6  | 2 -1 4 5 | 95701.2580  | -0.0022 | -0.0002 | 0.61 |
| 39: | 3 1 3 4  | 2 -1 3 4 | 95701.3340  | 0.0070  | 0.0019  | 0.65 |
| 40: | 3 1 3 3  | 2 -1 3 3 | 95701.3340  | -0.0075 | 0.0019  | 0.35 |
| 41: | 3 1 2 3  | 2 -1 2 2 | 95701.6930  | 0.0071  | 0.0025  | 0.16 |
| 42: | 3 1 2 3  | 2 -1 2 3 | 95701.6930  | 0.0016  | 0.0025  | 0.84 |
| 43: | 3 -1 4 3 | 2 1 4 3  | 95944.4960  | -0.0025 | -0.0007 | 0.23 |
| 44: | 3 -1 4 5 | 2 1 4 5  | 95944.4960  | 0.0030  | -0.0007 | 0.43 |
| 45: | 3 -1 4 4 | 2 1 4 4  | 95944.4960  | -0.0042 | -0.0007 | 0.34 |
| 46: | 3 -1 3 4 | 2 1 2 3  | 95944.9600  | 0.0088  | -0.0005 | 0.26 |
| 47: | 3 -1 4 3 | 2 1 3 2  | 95944.9600  | 0.0011  | -0.0005 | 0.20 |
| 48: | 3 -1 4 5 | 2 1 3 4  | 95944.9600  | -0.0034 | -0.0005 | 0.38 |
| 49: | 3 -1 3 3 | 2 1 2 2  | 95944.9600  | -0.0100 | -0.0005 | 0.17 |
| 50: | 3 -1 5 4 | 2 1 4 3  | 95945.2000  | 0.0004  | -0.0027 | 0.39 |
| 51: | 3 -1 5 6 | 2 1 4 5  | 95945.2000  | -0.0047 | -0.0027 | 0.61 |
| 52: | 3 -1 3 4 | 2 1 3 4  | 95945.2640  | 0.0045  | -0.0007 | 0.65 |
| 53: | 3 -1 3 3 | 2 1 3 3  | 95945.2640  | -0.0101 | -0.0007 | 0.35 |
| 54: | 3 -1 2 3 | 2 1 2 2  | 95945.6180  | 0.0069  | 0.0023  | 0.16 |
| 55: | 3 -1 2 3 | 2 1 2 3  | 95945.6180  | 0.0014  | 0.0023  | 0.84 |
| 56: | 4 -1 5 5 | 3 1 5 5  | 127599.1400 | -0.0017 | 0.0007  | 0.46 |
| 57: | 4 -1 5 6 | 3 1 5 6  | 127599.1400 | 0.0027  | 0.0007  | 0.54 |
| 58: | 4 -1 4 3 | 3 1 3 2  | 127599.8140 | -0.0019 | -0.0026 | 0.35 |
| 59: | 4 -1 4 5 | 3 1 3 4  | 127599.8140 | -0.0029 | -0.0026 | 0.65 |
| 60: | 4 -1 5 6 | 3 1 4 5  | 127599.8760 | 0.0011  | -0.0012 | 0.41 |
| 61: | 4 -1 5 4 | 3 1 4 3  | 127599.8760 | 0.0030  | -0.0012 | 0.25 |
| 62: | 4 -1 5 5 | 3 1 4 4  | 127599.8760 | -0.0073 | -0.0012 | 0.33 |
| 63: | 4 -1 6 7 | 3 1 5 6  | 127599.9760 | 0.0001  | -0.0024 | 0.55 |
| 64: | 4 -1 6 6 | 3 1 5 5  | 127599.9760 | -0.0054 | -0.0024 | 0.45 |
| 65: | 4 -1 4 3 | 3 1 4 3  | 127600.1280 | -0.0020 | -0.0014 | 0.27 |
| 66: | 4 -1 4 5 | 3 1 4 5  | 127600.1280 | 0.0030  | -0.0014 | 0.45 |
| 67: | 4 -1 4 4 | 3 1 4 4  | 127600.1280 | -0.0079 | -0.0014 | 0.28 |
| 68: | 4 -1 3 2 | 3 1 3 2  | 127600.5960 | 0.0043  | -0.0013 | 0.23 |
| 69: | 4 -1 3 4 | 3 1 3 4  | 127600.5960 | 0.0034  | -0.0013 | 0.48 |
| 70: | 4 -1 3 3 | 3 1 3 3  | 127600.5960 | -0.0139 | -0.0013 | 0.29 |
| 71: | 4 1 5 4  | 3 -1 5 4 | 127924.4120 | -0.0019 | 0.0035  | 0.40 |
| 72: | 4 1 5 6  | 3 -1 5 6 | 127924.4120 | 0.0071  | 0.0035  | 0.60 |
| 73: | 4 1 4 4  | 3 -1 3 4 | 127925.0630 | -0.0342 | -0.0045 | 0.03 |
| 74: | 4 1 4 4  | 3 -1 3 3 | 127925.0630 | -0.0098 | -0.0045 | 0.40 |
| 75: | 4 1 4 5  | 3 -1 3 4 | 127925.0630 | 0.0012  | -0.0045 | 0.56 |
| 76: | 4 1 5 4  | 3 -1 4 3 | 127925.1190 | 0.0041  | 0.0000  | 0.26 |
| 77: | 4 1 5 5  | 3 -1 4 4 | 127925.1190 | -0.0062 | 0.0000  | 0.33 |
| 78: | 4 1 5 6  | 3 -1 4 5 | 127925.1190 | 0.0022  | 0.0000  | 0.41 |
| 79: | 4 1 3 3  | 3 -1 2 2 | 127925.1520 | -0.0054 | 0.0014  | 0.38 |
| 80: | 4 1 3 4  | 3 -1 2 3 | 127925.1520 | 0.0057  | 0.0014  | 0.62 |

|      |          |          |             |         |         |      |
|------|----------|----------|-------------|---------|---------|------|
| 81:  | 4 1 6 5  | 3 -1 5 4 | 127925.2200 | 0.0039  | 0.0009  | 0.27 |
| 82:  | 4 1 6 7  | 3 -1 5 6 | 127925.2200 | 0.0022  | 0.0009  | 0.40 |
| 83:  | 4 1 6 6  | 3 -1 5 5 | 127925.2200 | -0.0032 | 0.0009  | 0.33 |
| 84:  | 4 1 3 3  | 3 -1 3 3 | 127925.8180 | -0.0109 | -0.0006 | 0.40 |
| 85:  | 4 1 3 4  | 3 -1 3 4 | 127925.8180 | 0.0063  | -0.0006 | 0.60 |
| 86:  | 5 1 5 6  | 4 -1 4 5 | 159497.2170 | -0.0025 | -0.0026 | 0.61 |
| 87:  | 5 1 5 4  | 4 -1 4 3 | 159497.2170 | -0.0026 | -0.0026 | 0.39 |
| 88:  | 5 1 4 5  | 4 -1 3 4 | 159497.2670 | 0.0086  | -0.0010 | 0.21 |
| 89:  | 5 1 6 7  | 4 -1 5 6 | 159497.2670 | -0.0021 | -0.0010 | 0.31 |
| 90:  | 5 1 6 5  | 4 -1 5 4 | 159497.2670 | -0.0014 | -0.0010 | 0.21 |
| 91:  | 5 1 6 6  | 4 -1 5 5 | 159497.2670 | -0.0071 | -0.0010 | 0.26 |
| 92:  | 5 1 7 8  | 4 -1 6 7 | 159497.3300 | 0.0068  | 0.0060  | 0.39 |
| 93:  | 5 1 7 6  | 4 -1 6 5 | 159497.3300 | 0.0073  | 0.0060  | 0.28 |
| 94:  | 5 1 7 7  | 4 -1 6 6 | 159497.3300 | 0.0036  | 0.0060  | 0.33 |
| 95:  | 5 -1 5 5 | 4 1 4 4  | 159903.7430 | -0.0079 | -0.0037 | 0.32 |
| 96:  | 5 -1 5 4 | 4 1 4 3  | 159903.7430 | -0.0016 | -0.0037 | 0.26 |
| 97:  | 5 -1 5 6 | 4 1 4 5  | 159903.7430 | -0.0015 | -0.0037 | 0.42 |
| 98:  | 5 -1 6 6 | 4 1 5 5  | 159903.7920 | -0.0054 | 0.0004  | 0.26 |
| 99:  | 5 -1 6 5 | 4 1 5 4  | 159903.7920 | 0.0003  | 0.0004  | 0.22 |
| 100: | 5 -1 4 5 | 4 1 3 4  | 159903.7920 | 0.0086  | 0.0004  | 0.22 |
| 101: | 5 -1 6 7 | 4 1 5 6  | 159903.7920 | -0.0004 | 0.0004  | 0.31 |
| 102: | 5 -1 7 6 | 4 1 6 5  | 159903.8510 | 0.0051  | 0.0037  | 0.28 |
| 103: | 5 -1 7 8 | 4 1 6 7  | 159903.8510 | 0.0046  | 0.0037  | 0.39 |
| 104: | 5 -1 7 7 | 4 1 6 6  | 159903.8510 | 0.0014  | 0.0037  | 0.33 |

Table S7

Observed saturation dip frequencies (MHz) and least-squares residuals for D(10)BS in its ground vibrational state.

| J' F1' F' <-- | J F1 F | observed | o-c        | blends o-c | blends wt   |
|---------------|--------|----------|------------|------------|-------------|
| 1:            | 2 3 3  | 1 2 2    | 66251.3540 | 0.0000     |             |
| 2:            | 2 3 4  | 1 2 3    | 66251.3690 | -0.0016    |             |
| 3:            | 2 3 2  | 1 2 1    | 66251.3940 | 0.0006     |             |
| 4:            | 2 4 4  | 1 4 4    | 66251.6700 | -0.0003    |             |
| 5:            | 2 4 5  | 1 4 5    | 66251.6950 | 0.0054     | 0.0009 0.63 |
| 6:            | 2 4 3  | 1 4 3    | 66251.6950 | -0.0067    | 0.0009 0.37 |
| 7:            | 2 3 3  | 1 4 4    | 66251.8720 | 0.0002     |             |
| 8:            | 2 3 4  | 1 4 5    | 66251.9120 | 0.0040     |             |
| 9:            | 2 2 2  | 1 2 2    | 66252.2920 | 0.0048     | 0.0041 0.81 |
| 10:           | 2 2 2  | 1 2 3    | 66252.2920 | 0.0009     | 0.0041 0.19 |
| 11:           | 2 2 3  | 1 2 3    | 66252.3140 | -0.0002    |             |
| 12:           | 2 5 6  | 1 4 5    | 66253.0960 | 0.0039     | 0.0008 0.41 |
| 13:           | 2 5 4  | 1 4 3    | 66253.0960 | 0.0030     | 0.0008 0.27 |
| 14:           | 2 5 5  | 1 4 4    | 66253.0960 | -0.0047    | 0.0008 0.33 |
| 15:           | 2 4 3  | 1 3 2    | 66253.2300 | -0.0018    |             |

|     |       |       |                |         |         |      |
|-----|-------|-------|----------------|---------|---------|------|
| 16: | 2 4 5 | 1 3 4 | 66253.2520     | 0.0002  |         |      |
| 17: | 2 4 3 | 1 3 3 | 66253.2860     | 0.0045  | 0.0005  | 0.11 |
| 18: | 2 4 4 | 1 3 3 | 66253.2860     | 0.0000  | 0.0005  | 0.89 |
| 19: | 2 1 2 | 1 2 2 | 66253.3130     | 0.0066  | 0.0037  | 0.10 |
| 20: | 2 1 0 | 1 2 1 | 66253.3130     | 0.0052  | 0.0037  | 0.12 |
| 21: | 2 1 1 | 1 2 2 | 66253.3130     | 0.0038  | 0.0037  | 0.28 |
| 22: | 2 1 2 | 1 2 3 | 66253.3130     | 0.0026  | 0.0037  | 0.50 |
| 23: | 2 3 2 | 1 3 2 | 66253.4670     | 0.0052  | -0.0004 | 0.34 |
| 24: | 2 3 4 | 1 3 4 | 66253.4670     | -0.0032 | -0.0004 | 0.66 |
| 25: | 2 3 3 | 1 3 3 | 66253.4900     | 0.0026  |         |      |
| 26: | 2 2 3 | 1 3 4 | 66254.4160     | 0.0021  | 0.0032  | 0.69 |
| 27: | 2 2 1 | 1 3 2 | 66254.4160     | 0.0054  | 0.0032  | 0.32 |
| 28: | 3 4 4 | 2 5 5 | 99377.0710     | 0.0006  |         |      |
| 29: | 3 4 5 | 2 5 6 | 99377.1020     | 0.0037  | -0.0027 | 0.59 |
| 30: | 3 4 3 | 2 5 4 | 99377.1020     | -0.0117 | -0.0027 | 0.41 |
| 31: | 3 4 4 | 2 5 5 | (a) 99377.1460 | 0.0756  | -0.0037 | 0.50 |
| 32: | 3 5 5 | 2 5 5 | (a) 99377.1460 | -0.0830 | -0.0037 | 0.50 |
| 33: | 3 4 5 | 2 5 6 | (a) 99377.1720 | 0.0737  | 0.0019  | 0.25 |
| 34: | 3 4 3 | 2 5 4 | (a) 99377.1720 | 0.0582  | 0.0019  | 0.25 |
| 35: | 3 5 5 | 2 5 5 | (a) 99377.1720 | -0.0570 | 0.0019  | 0.25 |
| 36: | 3 5 6 | 2 5 6 | (a) 99377.1720 | -0.0672 | 0.0019  | 0.25 |
| 37: | 3 5 5 | 2 5 5 | 99377.2390     | 0.0099  | -0.0001 | 0.33 |
| 38: | 3 5 6 | 2 5 6 | 99377.2390     | -0.0002 | -0.0001 | 0.40 |
| 39: | 3 5 4 | 2 5 4 | 99377.2390     | -0.0120 | -0.0001 | 0.27 |
| 40: | 3 2 2 | 2 1 1 | 99377.6040     | 0.0112  | 0.0011  | 0.34 |
| 41: | 3 2 3 | 2 1 2 | 99377.6040     | -0.0042 | 0.0011  | 0.66 |
| 42: | 3 3 2 | 2 2 1 | 99377.8530     | 0.0074  | 0.0010  | 0.30 |
| 43: | 3 3 3 | 2 2 3 | 99377.8530     | 0.0023  | 0.0010  | 0.05 |
| 44: | 3 3 4 | 2 2 3 | 99377.8530     | -0.0019 | 0.0010  | 0.65 |
| 45: | 3 3 3 | 2 2 2 | 99377.8750     | 0.0011  | -0.0001 | 0.89 |
| 46: | 3 3 2 | 2 2 2 | 99377.8750     | -0.0103 | -0.0001 | 0.11 |
| 47: | 3 4 3 | 2 3 2 | 99378.2790     | 0.0040  | -0.0006 | 0.38 |
| 48: | 3 4 5 | 2 3 4 | 99378.2790     | -0.0033 | -0.0006 | 0.62 |
| 49: | 3 4 5 | 2 3 4 | (a) 99378.3950 | 0.1126  | 0.0034  | 0.50 |
| 50: | 3 4 4 | 2 4 4 | (a) 99378.3950 | -0.1058 | 0.0034  | 0.50 |
| 51: | 3 4 4 | 2 4 4 | 99378.4990     | -0.0018 | -0.0029 | 0.34 |
| 52: | 3 4 5 | 2 4 5 | 99378.4990     | -0.0018 | -0.0029 | 0.39 |
| 53: | 3 4 3 | 2 4 3 | 99378.4990     | -0.0059 | -0.0029 | 0.28 |
| 54: | 3 6 7 | 2 5 6 | 99378.5530     | -0.0006 | -0.0019 | 0.39 |
| 55: | 3 6 5 | 2 5 4 | 99378.5530     | 0.0000  | -0.0019 | 0.28 |
| 56: | 3 6 6 | 2 5 5 | 99378.5530     | -0.0049 | -0.0019 | 0.33 |
| 57: | 3 5 6 | 2 4 5 | 99378.6440     | 0.0021  | 0.0020  | 0.61 |
| 58: | 3 5 4 | 2 4 3 | 99378.6440     | 0.0017  | 0.0020  | 0.39 |
| 59: | 3 3 2 | 2 3 2 | 99378.7980     | 0.0036  | -0.0022 | 0.24 |
| 60: | 3 3 4 | 2 3 4 | 99378.7980     | -0.0005 | -0.0022 | 0.45 |
| 61: | 3 3 3 | 2 3 3 | 99378.7980     | -0.0088 | -0.0022 | 0.31 |
| 62: | 3 3 4 | 2 3 4 | (a) 99378.9090 | 0.1104  | 0.0012  | 0.50 |
| 63: | 3 3 4 | 2 4 5 | (a) 99378.9090 | -0.1080 | 0.0012  | 0.50 |
| 64: | 3 3 3 | 2 4 4 | 99379.0140     | 0.0057  | -0.0027 | 0.28 |
| 65: | 3 3 4 | 2 4 5 | 99379.0140     | -0.0030 | -0.0027 | 0.43 |

|      |       |       |                 |         |         |      |
|------|-------|-------|-----------------|---------|---------|------|
| 66:  | 3 3 2 | 2 4 3 | 99379.0140      | -0.0103 | -0.0027 | 0.29 |
| 67:  | 3 1 2 | 2 2 3 | 99379.2800      | 0.0026  | 0.0008  | 0.66 |
| 68:  | 3 1 1 | 2 2 2 | 99379.2800      | -0.0025 | 0.0008  | 0.34 |
| 69:  | 3 2 3 | 2 3 4 | 99379.5480      | 0.0000  | -0.0004 | 0.47 |
| 70:  | 3 2 2 | 2 3 3 | 99379.5480      | 0.0001  | -0.0004 | 0.31 |
| 71:  | 3 2 1 | 2 3 2 | 99379.5480      | -0.0020 | -0.0004 | 0.22 |
| 72:  | 4 6 6 | 3 6 6 | 132501.6880     | 0.0084  | 0.0025  | 0.34 |
| 73:  | 4 6 7 | 3 6 7 | 132501.6880     | 0.0015  | 0.0025  | 0.40 |
| 74:  | 4 6 5 | 3 6 5 | 132501.6880     | -0.0037 | 0.0025  | 0.26 |
| 75:  | 4 3 4 | 3 2 3 | 132502.5340     | 0.0045  | -0.0031 | 0.42 |
| 76:  | 4 2 3 | 3 1 2 | 132502.5340     | -0.0003 | -0.0031 | 0.28 |
| 77:  | 4 3 3 | 3 2 2 | 132502.5340     | -0.0163 | -0.0031 | 0.30 |
| 78:  | 4 4 3 | 3 3 2 | 132502.6620     | 0.0090  | -0.0026 | 0.25 |
| 79:  | 4 4 5 | 3 3 4 | 132502.6620     | 0.0002  | -0.0026 | 0.41 |
| 80:  | 4 4 4 | 3 3 3 | 132502.6620     | -0.0143 | -0.0026 | 0.34 |
| 81:  | 4 5 5 | 3 5 5 | 132502.7150     | 0.0051  | 0.0017  | 0.39 |
| 82:  | 4 5 6 | 3 5 6 | 132502.7150     | 0.0017  | 0.0017  | 0.42 |
| 83:  | 4 1 1 | 3 0 1 | 132502.7150     | -0.0056 | 0.0017  | 0.19 |
| 84:  | 4 1 1 | 3 0 1 | (a) 132502.7850 | 0.0643  | 0.0001  | 0.50 |
| 85:  | 4 5 4 | 3 4 3 | (a) 132502.7850 | -0.0640 | 0.0001  | 0.50 |
| 86:  | 4 5 4 | 3 4 3 | 132502.8560     | 0.0069  | -0.0015 | 0.26 |
| 87:  | 4 5 6 | 3 4 5 | 132502.8560     | 0.0017  | -0.0015 | 0.41 |
| 88:  | 4 5 5 | 3 4 4 | 132502.8560     | -0.0124 | -0.0015 | 0.32 |
| 89:  | 4 7 8 | 3 6 7 | 132502.9440     | -0.0014 | -0.0022 | 0.38 |
| 90:  | 4 7 6 | 3 6 5 | 132502.9440     | -0.0014 | -0.0022 | 0.29 |
| 91:  | 4 7 7 | 3 6 6 | 132502.9440     | -0.0039 | -0.0022 | 0.33 |
| 92:  | 4 6 7 | 3 5 6 | 132503.0080     | 0.0070  | 0.0037  | 0.55 |
| 93:  | 4 6 6 | 3 5 5 | 132503.0080     | -0.0004 | 0.0037  | 0.45 |
| 94:  | 4 3 3 | 3 3 4 | 132503.2860     | -0.0010 | -0.0047 | 0.08 |
| 95:  | 4 3 2 | 3 3 3 | 132503.2860     | -0.0011 | -0.0047 | 0.08 |
| 96:  | 4 3 3 | 3 3 3 | 132503.2860     | -0.0053 | -0.0047 | 0.84 |
| 97:  | 4 1 1 | 3 2 2 | 132503.7950     | 0.0023  | -0.0006 | 0.16 |
| 98:  | 4 3 2 | 3 4 3 | 132503.7950     | 0.0000  | -0.0006 | 0.23 |
| 99:  | 4 3 4 | 3 4 5 | 132503.7950     | 0.0000  | -0.0006 | 0.37 |
| 100: | 4 3 3 | 3 4 4 | 132503.7950     | -0.0038 | -0.0006 | 0.24 |
| 101: | 4 2 1 | 3 3 2 | 132503.9590     | 0.0054  | -0.0004 | 0.23 |
| 102: | 4 2 3 | 3 3 4 | 132503.9590     | 0.0023  | -0.0004 | 0.48 |
| 103: | 4 2 2 | 3 3 3 | 132503.9590     | -0.0094 | -0.0004 | 0.29 |
| 104: | 5 5 6 | 4 4 5 | 165625.7150     | 0.0003  | -0.0001 | 0.57 |
| 105: | 5 5 4 | 4 4 3 | 165625.7150     | -0.0007 | -0.0001 | 0.43 |
| 106: | 5 6 5 | 4 5 4 | 165625.8300     | 0.0012  | -0.0031 | 0.27 |
| 107: | 5 6 7 | 4 5 6 | 165625.8300     | -0.0010 | -0.0031 | 0.39 |
| 108: | 5 6 6 | 4 5 5 | 165625.8300     | -0.0090 | -0.0031 | 0.33 |
| 109: | 5 8 9 | 4 7 8 | 165625.8750     | 0.0020  | 0.0015  | 0.38 |
| 110: | 5 8 7 | 4 7 6 | 165625.8750     | 0.0019  | 0.0015  | 0.29 |
| 111: | 5 8 8 | 4 7 7 | 165625.8750     | 0.0005  | 0.0015  | 0.33 |
| 112: | 6 4 5 | 5 3 4 | 198746.8020     | 0.0072  | -0.0016 | 0.32 |
| 113: | 6 5 6 | 5 4 5 | 198746.8020     | -0.0019 | -0.0016 | 0.38 |
| 114: | 6 5 5 | 5 4 4 | 198746.8020     | -0.0102 | -0.0016 | 0.31 |
| 115: | 6 3 4 | 5 2 3 | 198746.8610     | 0.0094  | 0.0001  | 0.19 |

|      |        |       |             |         |        |      |
|------|--------|-------|-------------|---------|--------|------|
| 116: | 6 6 5  | 5 5 4 | 198746.8610 | 0.0012  | 0.0001 | 0.22 |
| 117: | 6 6 7  | 5 5 6 | 198746.8610 | -0.0005 | 0.0001 | 0.31 |
| 118: | 6 6 6  | 5 5 5 | 198746.8610 | -0.0068 | 0.0001 | 0.27 |
| 119: | 6 7 6  | 5 6 5 | 198746.9370 | 0.0032  | 0.0007 | 0.28 |
| 120: | 6 7 8  | 5 6 7 | 198746.9370 | 0.0019  | 0.0007 | 0.38 |
| 121: | 6 7 7  | 5 6 6 | 198746.9370 | -0.0027 | 0.0007 | 0.33 |
| 122: | 6 9 10 | 5 8 9 | 198746.9600 | 0.0020  | 0.0016 | 0.37 |
| 123: | 6 9 8  | 5 8 7 | 198746.9600 | 0.0018  | 0.0016 | 0.30 |
| 124: | 6 9 9  | 5 8 8 | 198746.9600 | 0.0009  | 0.0016 | 0.33 |
| 125: | 6 8 7  | 5 7 6 | 198746.9880 | 0.0040  | 0.0022 | 0.29 |
| 126: | 6 8 9  | 5 7 8 | 198746.9880 | 0.0029  | 0.0022 | 0.38 |
| 127: | 6 8 8  | 5 7 7 | 198746.9880 | -0.0001 | 0.0022 | 0.33 |

-----  
 (a) cross-over transition.

Table S8

Observed saturation dip frequencies (MHz) and least-squares residuals for D(10)BS in its  $\nu_2 = 1$  vibrationally excited.

|     | J' I' F1' F' <-- J I F1 F | observed     | o-c        | blends o-c | blends wt |      |
|-----|---------------------------|--------------|------------|------------|-----------|------|
| 1:  | 2 -1 4 4                  | 1 1 3 3      | 66315.2880 | 0.0130     | -0.0003   | 0.34 |
| 2:  | 2 -1 4 5                  | 1 1 3 4      | 66315.2880 | -0.0035    | -0.0003   | 0.43 |
| 3:  | 2 -1 4 3                  | 1 1 3 2      | 66315.2880 | -0.0140    | -0.0003   | 0.23 |
| 4:  | 2 -1 4 5                  | 1 1 3 4 (a)  | 66315.3440 | 0.0524     | -0.0017   | 0.50 |
| 5:  | 2 -1 3 4                  | 1 1 3 4 (a)  | 66315.3440 | -0.0557    | -0.0017   | 0.50 |
| 6:  | 2 -1 3 4                  | 1 1 3 4      | 66315.3980 | -0.0017    |           |      |
| 7:  | 2 -1 2 3                  | 1 1 3 4      | 66315.8830 | 0.0072     | 0.0007    | 0.69 |
| 8:  | 2 -1 2 1                  | 1 1 3 2      | 66315.8830 | -0.0136    | 0.0007    | 0.31 |
| 9:  | 2 -1 4 3                  | 1 1 4 3      | 66316.0310 | 0.0104     | -0.0016   | 0.24 |
| 10: | 2 -1 4 5                  | 1 1 4 5      | 66316.0310 | 0.0021     | -0.0016   | 0.42 |
| 11: | 2 -1 4 4                  | 1 1 4 4      | 66316.0310 | -0.0149    | -0.0016   | 0.34 |
| 12: | 2 -1 3 3                  | 1 1 2 2      | 66316.4120 | 0.0047     | 0.0011    | 0.32 |
| 13: | 2 -1 3 2                  | 1 1 2 1      | 66316.4120 | 0.0000     | 0.0011    | 0.22 |
| 14: | 2 -1 3 4                  | 1 1 2 3      | 66316.4120 | -0.0007    | 0.0011    | 0.46 |
| 15: | 2 -1 5 6                  | 1 1 4 5      | 66316.7420 | -0.0011    |           |      |
| 16: | 2 -1 5 5                  | 1 1 4 4      | 66316.7780 | 0.0000     |           |      |
| 17: | 2 -1 2 2                  | 1 1 2 2      | 66316.8850 | 0.0084     | -0.0009   | 0.28 |
| 18: | 2 -1 2 3                  | 1 1 2 3      | 66316.8850 | -0.0037    | -0.0009   | 0.52 |
| 19: | 2 -1 2 1                  | 1 1 2 1      | 66316.8850 | -0.0065    | -0.0009   | 0.20 |
| 20: | 2 -1 1 1                  | 1 1 2 2      | 66317.3950 | -0.0007    |           |      |
| 21: | 2 1 4 4                   | 1 -1 3 3     | 66487.9640 | 0.0141     | 0.0009    | 0.34 |
| 22: | 2 1 4 5                   | 1 -1 3 4     | 66487.9640 | -0.0024    | 0.0009    | 0.43 |
| 23: | 2 1 4 3                   | 1 -1 3 2     | 66487.9640 | -0.0127    | 0.0009    | 0.23 |
| 24: | 2 1 4 5                   | 1 -1 3 4 (a) | 66488.0130 | 0.0465     | -0.0045   | 0.50 |
| 25: | 2 1 3 4                   | 1 -1 3 4 (a) | 66488.0130 | -0.0555    | -0.0045   | 0.50 |
| 26: | 2 1 3 4                   | 1 -1 3 4     | 66488.0700 | 0.0014     |           |      |

|     |          |              |            |         |         |      |
|-----|----------|--------------|------------|---------|---------|------|
| 27: | 2 1 2 3  | 1 -1 3 4     | 66488.5270 | 0.0087  | 0.0022  | 0.69 |
| 28: | 2 1 2 1  | 1 -1 3 2     | 66488.5270 | -0.0120 | 0.0022  | 0.31 |
| 29: | 2 1 4 3  | 1 -1 4 3     | 66488.7530 | 0.0143  | 0.0023  | 0.24 |
| 30: | 2 1 4 5  | 1 -1 4 5     | 66488.7530 | 0.0060  | 0.0023  | 0.42 |
| 31: | 2 1 4 4  | 1 -1 4 4     | 66488.7530 | -0.0110 | 0.0023  | 0.34 |
| 32: | 2 1 3 3  | 1 -1 2 2     | 66489.1400 | 0.0055  | 0.0021  | 0.32 |
| 33: | 2 1 3 2  | 1 -1 2 1     | 66489.1400 | 0.0008  | 0.0021  | 0.22 |
| 34: | 2 1 3 4  | 1 -1 2 3     | 66489.1400 | 0.0001  | 0.0021  | 0.46 |
| 35: | 2 1 5 6  | 1 -1 4 5     | 66489.4230 | 0.0002  |         |      |
| 36: | 2 1 5 5  | 1 -1 4 4     | 66489.4570 | -0.0005 |         |      |
| 37: | 2 1 2 2  | 1 -1 2 2     | 66489.5880 | 0.0105  | 0.0013  | 0.28 |
| 38: | 2 1 2 3  | 1 -1 2 3     | 66489.5880 | -0.0015 | 0.0013  | 0.52 |
| 39: | 2 1 2 1  | 1 -1 2 1     | 66489.5880 | -0.0043 | 0.0013  | 0.20 |
| 40: | 2 1 1 1  | 1 -1 2 2     | 66490.0690 | 0.0001  |         |      |
| 41: | 3 1 4 4  | 2 -1 5 5 (a) | 99472.6280 | 0.0597  | -0.0029 | 0.50 |
| 42: | 3 1 5 6  | 2 -1 5 6 (a) | 99472.6280 | -0.0654 | -0.0029 | 0.50 |
| 43: | 3 1 5 5  | 2 -1 5 5     | 99472.6960 | 0.0022  | 0.0005  | 0.33 |
| 44: | 3 1 5 6  | 2 -1 5 6     | 99472.6960 | 0.0025  | 0.0005  | 0.40 |
| 45: | 3 1 5 4  | 2 -1 5 4     | 99472.6960 | -0.0044 | 0.0005  | 0.27 |
| 46: | 3 1 3 2  | 2 -1 2 1     | 99473.1040 | 0.0044  | -0.0024 | 0.21 |
| 47: | 3 1 3 4  | 2 -1 2 3     | 99473.1040 | -0.0001 | -0.0024 | 0.46 |
| 48: | 3 1 3 3  | 2 -1 2 2     | 99473.1040 | -0.0099 | -0.0024 | 0.33 |
| 49: | 3 1 2 2  | 2 -1 1 1     | 99473.1620 | 0.0114  | 0.0020  | 0.34 |
| 50: | 3 1 2 3  | 2 -1 1 2     | 99473.1620 | -0.0029 | 0.0020  | 0.66 |
| 51: | 3 1 4 3  | 2 -1 3 2     | 99473.1940 | 0.0058  | -0.0003 | 0.25 |
| 52: | 3 1 4 5  | 2 -1 3 4     | 99473.1940 | 0.0025  | -0.0003 | 0.42 |
| 53: | 3 1 4 4  | 2 -1 3 3     | 99473.1940 | -0.0085 | -0.0003 | 0.33 |
| 54: | 3 1 4 4  | 2 -1 3 3 (a) | 99473.2520 | 0.0494  | 0.0009  | 0.50 |
| 55: | 3 1 4 5  | 2 -1 4 5 (a) | 99473.2520 | -0.0476 | 0.0009  | 0.50 |
| 56: | 3 1 4 5  | 2 -1 4 5     | 99473.3000 | 0.0003  | -0.0009 | 0.39 |
| 57: | 3 1 4 4  | 2 -1 4 4     | 99473.3000 | -0.0004 | -0.0009 | 0.33 |
| 58: | 3 1 4 3  | 2 -1 4 3     | 99473.3000 | -0.0032 | -0.0009 | 0.28 |
| 59: | 3 1 4 3  | 2 -1 4 3 (a) | 99473.3560 | 0.0527  | 0.0005  | 0.50 |
| 60: | 3 1 5 6  | 2 -1 4 5 (a) | 99473.3560 | -0.0517 | 0.0005  | 0.50 |
| 61: | 3 1 5 6  | 2 -1 4 5     | 99473.4130 | 0.0052  | -0.0009 | 0.41 |
| 62: | 3 1 5 4  | 2 -1 4 3     | 99473.4130 | 0.0038  | -0.0009 | 0.27 |
| 63: | 3 1 5 5  | 2 -1 4 4     | 99473.4130 | -0.0128 | -0.0009 | 0.32 |
| 64: | 3 1 6 5  | 2 -1 5 4     | 99473.6840 | 0.0020  | -0.0001 | 0.42 |
| 65: | 3 1 6 7  | 2 -1 5 6     | 99473.6840 | -0.0016 | -0.0001 | 0.58 |
| 66: | 3 1 0 1  | 2 -1 1 1     | 99473.9580 | -0.0012 | -0.0035 | 0.34 |
| 67: | 3 1 0 1  | 2 -1 1 2     | 99473.9580 | -0.0033 | -0.0035 | 0.55 |
| 68: | 3 1 0 1  | 2 -1 1 0     | 99473.9580 | -0.0113 | -0.0035 | 0.11 |
| 69: | 3 1 2 2  | 2 -1 3 3     | 99474.1410 | 0.0018  | -0.0023 | 0.31 |
| 70: | 3 1 2 3  | 2 -1 3 4     | 99474.1410 | -0.0025 | -0.0023 | 0.47 |
| 71: | 3 1 2 1  | 2 -1 3 2     | 99474.1410 | -0.0075 | -0.0023 | 0.22 |
| 72: | 3 1 1 1  | 2 -1 2 2     | 99474.1710 | -0.0002 | -0.0019 | 0.35 |
| 73: | 3 1 1 2  | 2 -1 2 3     | 99474.1710 | -0.0027 | -0.0019 | 0.65 |
| 74: | 3 -1 4 4 | 2 1 5 5 (a)  | 99731.6850 | 0.0645  | 0.0035  | 0.50 |
| 75: | 3 -1 5 5 | 2 1 5 5 (a)  | 99731.6850 | -0.0574 | 0.0035  | 0.50 |
| 76: | 3 -1 5 5 | 2 1 5 5      | 99731.7460 | 0.0035  | 0.0018  | 0.33 |

|      |          |             |             |         |         |      |
|------|----------|-------------|-------------|---------|---------|------|
| 77:  | 3 -1 5 6 | 2 1 5 6     | 99731.7460  | 0.0038  | 0.0018  | 0.40 |
| 78:  | 3 -1 5 4 | 2 1 5 4     | 99731.7460  | -0.0032 | 0.0018  | 0.27 |
| 79:  | 3 -1 3 2 | 2 1 2 1     | 99732.1360  | 0.0046  | -0.0022 | 0.21 |
| 80:  | 3 -1 3 4 | 2 1 2 3     | 99732.1360  | 0.0000  | -0.0022 | 0.46 |
| 81:  | 3 -1 3 3 | 2 1 2 2     | 99732.1360  | -0.0097 | -0.0022 | 0.33 |
| 82:  | 3 -1 4 3 | 2 1 3 2     | 99732.2140  | 0.0059  | 0.0000  | 0.25 |
| 83:  | 3 -1 4 5 | 2 1 3 4     | 99732.2140  | 0.0027  | 0.0000  | 0.42 |
| 84:  | 3 -1 4 4 | 2 1 3 3     | 99732.2140  | -0.0081 | 0.0000  | 0.33 |
| 85:  | 3 -1 4 4 | 2 1 3 3 (a) | 99732.2690  | 0.0468  | 0.0013  | 0.50 |
| 86:  | 3 -1 4 5 | 2 1 4 5 (a) | 99732.2690  | -0.0443 | 0.0013  | 0.50 |
| 87:  | 3 -1 4 5 | 2 1 4 5     | 99732.3150  | 0.0017  | 0.0004  | 0.39 |
| 88:  | 3 -1 4 4 | 2 1 4 4     | 99732.3150  | 0.0009  | 0.0004  | 0.33 |
| 89:  | 3 -1 4 3 | 2 1 4 3     | 99732.3150  | -0.0021 | 0.0004  | 0.28 |
| 90:  | 3 -1 4 3 | 2 1 4 3 (a) | 99732.3680  | 0.0509  | 0.0005  | 0.50 |
| 91:  | 3 -1 5 6 | 2 1 4 5 (a) | 99732.3680  | -0.0499 | 0.0005  | 0.50 |
| 92:  | 3 -1 5 6 | 2 1 4 5     | 99732.4250  | 0.0070  | 0.0009  | 0.41 |
| 93:  | 3 -1 5 4 | 2 1 4 3     | 99732.4250  | 0.0054  | 0.0009  | 0.27 |
| 94:  | 3 -1 5 5 | 2 1 4 4     | 99732.4250  | -0.0110 | 0.0009  | 0.32 |
| 95:  | 3 -1 3 2 | 2 1 3 2     | 99732.5850  | 0.0004  | -0.0014 | 0.24 |
| 96:  | 3 -1 3 4 | 2 1 3 4     | 99732.5850  | -0.0006 | -0.0014 | 0.45 |
| 97:  | 3 -1 3 3 | 2 1 3 3     | 99732.5850  | -0.0037 | -0.0014 | 0.31 |
| 98:  | 3 -1 6 5 | 2 1 5 4     | 99732.6990  | 0.0043  | 0.0022  | 0.41 |
| 99:  | 3 -1 6 7 | 2 1 5 6     | 99732.6990  | 0.0006  | 0.0022  | 0.59 |
| 100: | 3 -1 0 1 | 2 1 1 1     | 99732.9680  | -0.0003 | -0.0016 | 0.38 |
| 101: | 3 -1 0 1 | 2 1 1 2     | 99732.9680  | -0.0024 | -0.0016 | 0.62 |
| 102: | 3 -1 2 2 | 2 1 3 3     | 99733.1310  | 0.0073  | 0.0031  | 0.30 |
| 103: | 3 -1 2 3 | 2 1 3 4     | 99733.1310  | 0.0029  | 0.0031  | 0.47 |
| 104: | 3 -1 2 1 | 2 1 3 2     | 99733.1310  | -0.0021 | 0.0031  | 0.22 |
| 105: | 3 -1 1 1 | 2 1 2 2     | 99733.1680  | 0.0046  | 0.0030  | 0.34 |
| 106: | 3 -1 1 2 | 2 1 2 3     | 99733.1680  | 0.0021  | 0.0030  | 0.66 |
| 107: | 4 -1 6 6 | 3 1 6 6     | 132628.5990 | 0.0034  | 0.0007  | 0.35 |
| 108: | 4 -1 6 7 | 3 1 6 7     | 132628.5990 | 0.0002  | 0.0007  | 0.40 |
| 109: | 4 -1 6 5 | 3 1 6 5     | 132628.5990 | -0.0022 | 0.0007  | 0.25 |
| 110: | 4 -1 4 3 | 3 1 3 2     | 132629.3410 | 0.0091  | 0.0034  | 0.39 |
| 111: | 4 -1 4 5 | 3 1 3 4     | 132629.3410 | -0.0001 | 0.0034  | 0.61 |
| 112: | 4 -1 1 1 | 3 1 1 2     | 132629.8710 | 0.0090  | -0.0006 | 0.07 |
| 113: | 4 -1 3 4 | 3 1 3 4     | 132629.8710 | 0.0065  | -0.0006 | 0.37 |
| 114: | 4 -1 3 3 | 3 1 3 3     | 132629.8710 | -0.0059 | -0.0006 | 0.25 |
| 115: | 4 -1 2 3 | 3 1 2 3     | 132629.8710 | -0.0069 | -0.0006 | 0.31 |
| 116: | 4 -1 5 4 | 3 1 4 3     | 132629.4600 | 0.0122  | 0.0036  | 0.26 |
| 117: | 4 -1 5 6 | 3 1 4 5     | 132629.4600 | 0.0073  | 0.0036  | 0.42 |
| 118: | 4 -1 5 5 | 3 1 4 4     | 132629.4600 | -0.0082 | 0.0036  | 0.32 |
| 119: | 4 -1 6 5 | 3 1 5 4     | 132629.5920 | 0.0093  | -0.0003 | 0.27 |
| 120: | 4 -1 6 7 | 3 1 5 6     | 132629.5920 | 0.0010  | -0.0003 | 0.40 |
| 121: | 4 -1 6 6 | 3 1 5 5     | 132629.5920 | -0.0095 | -0.0003 | 0.33 |
| 122: | 4 -1 7 6 | 3 1 6 5     | 132629.6770 | 0.0054  | 0.0021  | 0.29 |
| 123: | 4 -1 7 8 | 3 1 6 7     | 132629.6770 | 0.0041  | 0.0021  | 0.38 |
| 124: | 4 -1 7 7 | 3 1 6 6     | 132629.6770 | -0.0030 | 0.0021  | 0.33 |
| 125: | 4 1 6 6  | 3 -1 6 6    | 132973.9650 | 0.0035  | 0.0009  | 0.35 |
| 126: | 4 1 6 7  | 3 -1 6 7    | 132973.9650 | 0.0002  | 0.0009  | 0.40 |



|      |          |          |             |         |         |      |
|------|----------|----------|-------------|---------|---------|------|
| 127: | 4 1 6 5  | 3 -1 6 5 | 132973.9650 | -0.0019 | 0.0009  | 0.25 |
| 128: | 4 1 4 3  | 3 -1 3 2 | 132974.6740 | 0.0030  | -0.0028 | 0.39 |
| 129: | 4 1 4 5  | 3 -1 3 4 | 132974.6740 | -0.0065 | -0.0028 | 0.61 |
| 130: | 4 1 3 2  | 3 -1 3 2 | 132975.1910 | 0.0074  | -0.0017 | 0.17 |
| 131: | 4 1 3 4  | 3 -1 3 4 | 132975.1910 | 0.0048  | -0.0017 | 0.33 |
| 132: | 4 1 3 3  | 3 -1 3 3 | 132975.1910 | -0.0076 | -0.0017 | 0.22 |
| 133: | 4 1 2 3  | 3 -1 2 3 | 132975.1910 | -0.0106 | -0.0017 | 0.28 |
| 134: | 4 1 5 4  | 3 -1 4 3 | 132974.7920 | 0.0104  | 0.0017  | 0.26 |
| 135: | 4 1 5 6  | 3 -1 4 5 | 132974.7920 | 0.0054  | 0.0017  | 0.42 |
| 136: | 4 1 5 5  | 3 -1 4 4 | 132974.7920 | -0.0101 | 0.0017  | 0.32 |
| 137: | 4 1 6 5  | 3 -1 5 4 | 132974.9180 | 0.0056  | -0.0041 | 0.26 |
| 138: | 4 1 6 7  | 3 -1 5 6 | 132974.9180 | -0.0028 | -0.0041 | 0.40 |
| 139: | 4 1 6 6  | 3 -1 5 5 | 132974.9180 | -0.0134 | -0.0041 | 0.33 |
| 140: | 4 1 7 6  | 3 -1 6 5 | 132975.0040 | 0.0009  | -0.0024 | 0.29 |
| 141: | 4 1 7 8  | 3 -1 6 7 | 132975.0040 | -0.0004 | -0.0024 | 0.38 |
| 142: | 4 1 7 7  | 3 -1 6 6 | 132975.0040 | -0.0075 | -0.0024 | 0.33 |
| 143: | 5 1 6 6  | 4 -1 6 6 | 165783.8500 | -0.0010 | -0.0032 | 0.37 |
| 144: | 5 1 6 7  | 4 -1 6 7 | 165783.8500 | -0.0033 | -0.0032 | 0.39 |
| 145: | 5 1 6 5  | 4 -1 6 5 | 165783.8500 | -0.0064 | -0.0032 | 0.24 |
| 146: | 5 1 4 3  | 4 -1 3 2 | 165783.9710 | 0.0030  | 0.0011  | 0.37 |
| 147: | 5 1 4 5  | 4 -1 3 4 | 165783.9710 | 0.0000  | 0.0011  | 0.63 |
| 148: | 5 1 3 4  | 4 -1 2 3 | 165784.0080 | 0.0098  | 0.0014  | 0.30 |
| 149: | 5 1 5 6  | 4 -1 4 5 | 165784.0080 | -0.0012 | 0.0014  | 0.39 |
| 150: | 5 1 5 4  | 4 -1 4 3 | 165784.0080 | -0.0034 | 0.0014  | 0.31 |
| 151: | 5 1 6 5  | 4 -1 5 4 | 165784.1000 | 0.0027  | 0.0012  | 0.41 |
| 152: | 5 1 6 7  | 4 -1 5 6 | 165784.1000 | 0.0001  | 0.0012  | 0.59 |
| 153: | 5 1 7 8  | 4 -1 6 7 | 165784.2010 | 0.0154  | 0.0024  | 0.32 |
| 154: | 5 1 7 7  | 4 -1 6 6 | 165784.2010 | 0.0083  | 0.0024  | 0.28 |
| 155: | 5 1 8 9  | 4 -1 7 8 | 165784.2010 | -0.0124 | 0.0024  | 0.40 |
| 156: | 5 1 5 4  | 4 -1 5 4 | 165784.2880 | 0.0015  | -0.0007 | 0.30 |
| 157: | 5 1 5 6  | 4 -1 5 6 | 165784.2880 | 0.0016  | -0.0007 | 0.42 |
| 158: | 5 1 5 5  | 4 -1 5 5 | 165784.2880 | -0.0065 | -0.0007 | 0.28 |
| 159: | 5 1 4 5  | 4 -1 4 5 | 165784.4980 | 0.0036  | -0.0018 | 0.40 |
| 160: | 5 1 4 3  | 4 -1 4 3 | 165784.4980 | 0.0000  | -0.0018 | 0.28 |
| 161: | 5 1 4 4  | 4 -1 4 4 | 165784.4980 | -0.0103 | -0.0018 | 0.32 |
| 162: | 5 1 3 2  | 4 -1 3 2 | 165784.5760 | 0.0050  | 0.0018  | 0.25 |
| 163: | 5 1 3 4  | 4 -1 3 4 | 165784.5760 | 0.0009  | 0.0018  | 0.46 |
| 164: | 5 1 2 3  | 4 -1 2 3 | 165784.5760 | 0.0003  | 0.0018  | 0.30 |
| 165: | 5 -1 4 3 | 4 1 3 2  | 166215.6060 | -0.0004 | -0.0024 | 0.37 |
| 166: | 5 -1 4 5 | 4 1 3 4  | 166215.6060 | -0.0035 | -0.0024 | 0.63 |
| 167: | 5 -1 3 4 | 4 1 2 3  | 166215.6420 | 0.0052  | -0.0015 | 0.30 |
| 168: | 5 -1 5 6 | 4 1 4 5  | 166215.6420 | -0.0033 | -0.0015 | 0.39 |
| 169: | 5 -1 5 4 | 4 1 4 3  | 166215.6420 | -0.0057 | -0.0015 | 0.31 |
| 170: | 5 -1 6 5 | 4 1 5 4  | 166215.7310 | 0.0003  | -0.0011 | 0.41 |
| 171: | 5 -1 6 7 | 4 1 5 6  | 166215.7310 | -0.0021 | -0.0011 | 0.59 |
| 172: | 5 -1 7 8 | 4 1 6 7  | 166215.8290 | 0.0122  | -0.0013 | 0.32 |
| 173: | 5 -1 7 7 | 4 1 6 6  | 166215.8290 | 0.0051  | -0.0013 | 0.28 |
| 174: | 5 -1 8 9 | 4 1 7 8  | 166215.8290 | -0.0167 | -0.0013 | 0.40 |
| 175: | 5 -1 5 4 | 4 1 5 4  | 166215.9190 | 0.0053  | 0.0030  | 0.30 |
| 176: | 5 -1 5 6 | 4 1 5 6  | 166215.9190 | 0.0053  | 0.0030  | 0.42 |

|      |          |         |             |         |         |      |
|------|----------|---------|-------------|---------|---------|------|
| 177: | 5 -1 5 5 | 4 1 5 5 | 166215.9190 | -0.0029 | 0.0030  | 0.28 |
| 178: | 5 -1 4 5 | 4 1 4 5 | 166216.1200 | 0.0048  | -0.0008 | 0.39 |
| 179: | 5 -1 4 3 | 4 1 4 3 | 166216.1200 | 0.0009  | -0.0008 | 0.28 |
| 180: | 5 -1 4 4 | 4 1 4 4 | 166216.1200 | -0.0093 | -0.0008 | 0.32 |
| 181: | 5 -1 3 2 | 4 1 3 2 | 166216.1960 | 0.0053  | 0.0018  | 0.25 |
| 182: | 5 -1 3 4 | 4 1 3 4 | 166216.1960 | 0.0012  | 0.0018  | 0.46 |
| 183: | 5 -1 2 3 | 4 1 2 3 | 166216.1960 | -0.0002 | 0.0018  | 0.30 |

---

(a) cross-over transition.
